# Supplementary figures and images for: Critical role of the MCAM-ETV4 axis triggered by extracellular S100A8/A9 in breast cancer aggressiveness
Source: PubMed Central journal article supplement — Neoplasia. 2019 May 14;21(7):627–40. doi: 10.1016/j.neo.2019.04.006 (PMC6520639; doi:10.1016/j.neo.2019.04.006), 2019-05-14

## **Supplementary Figures**

**Chen et al.**

Fig. S1

A

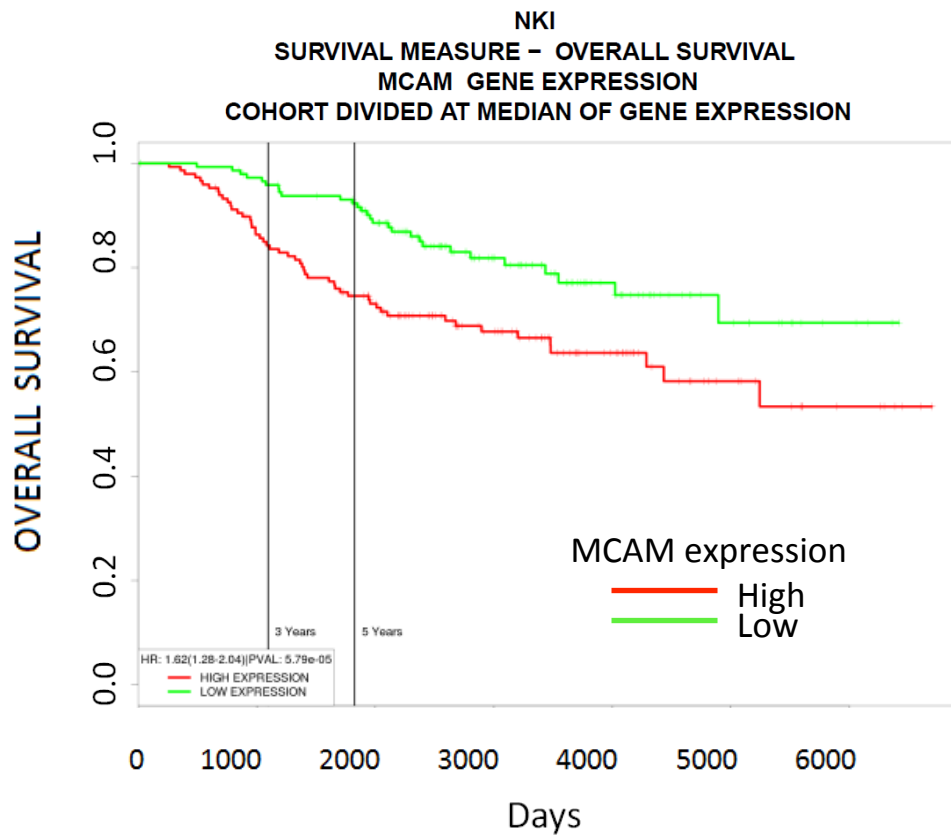

B

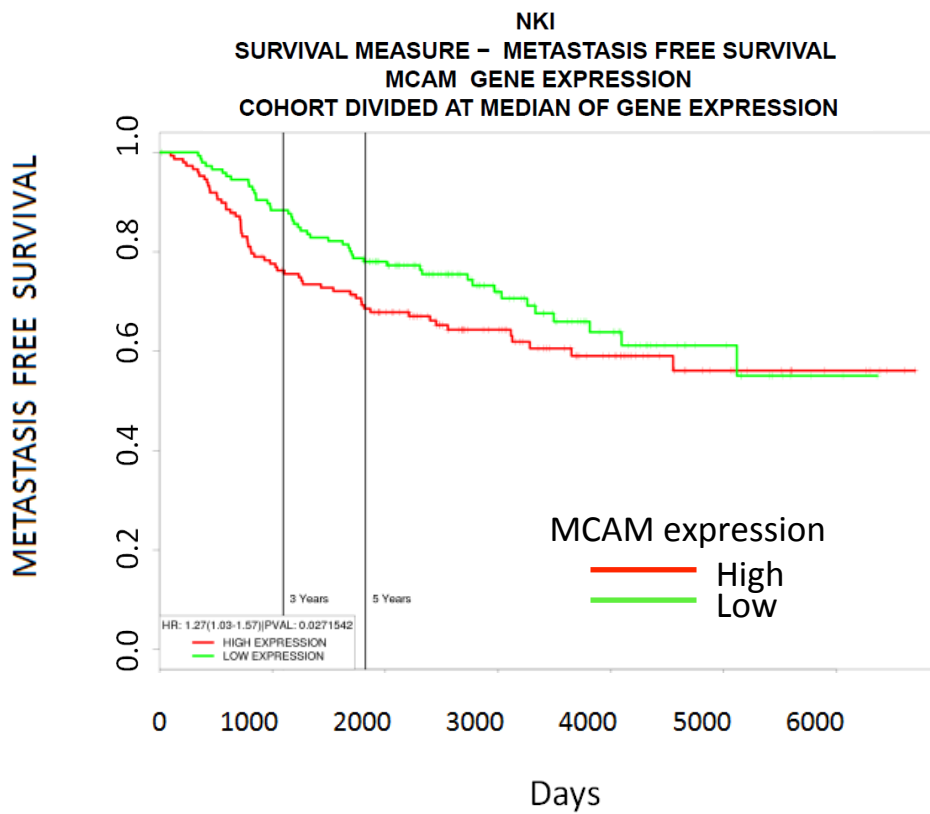

**Fig. S2**

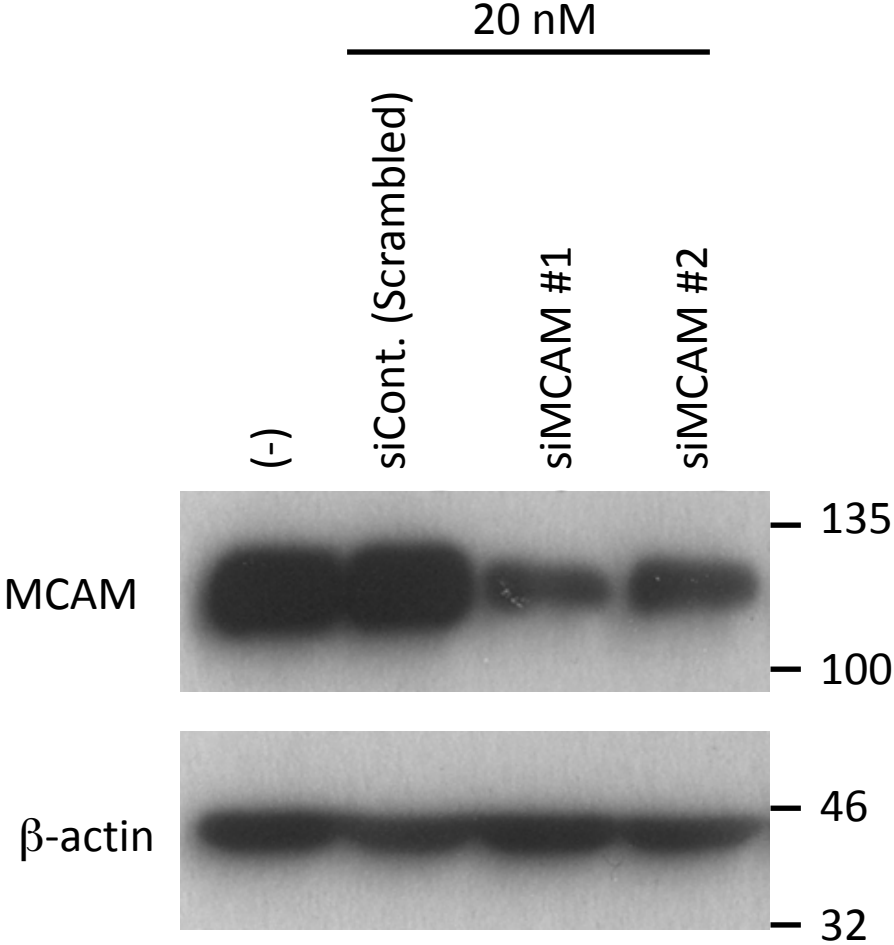

**Fig. S3**

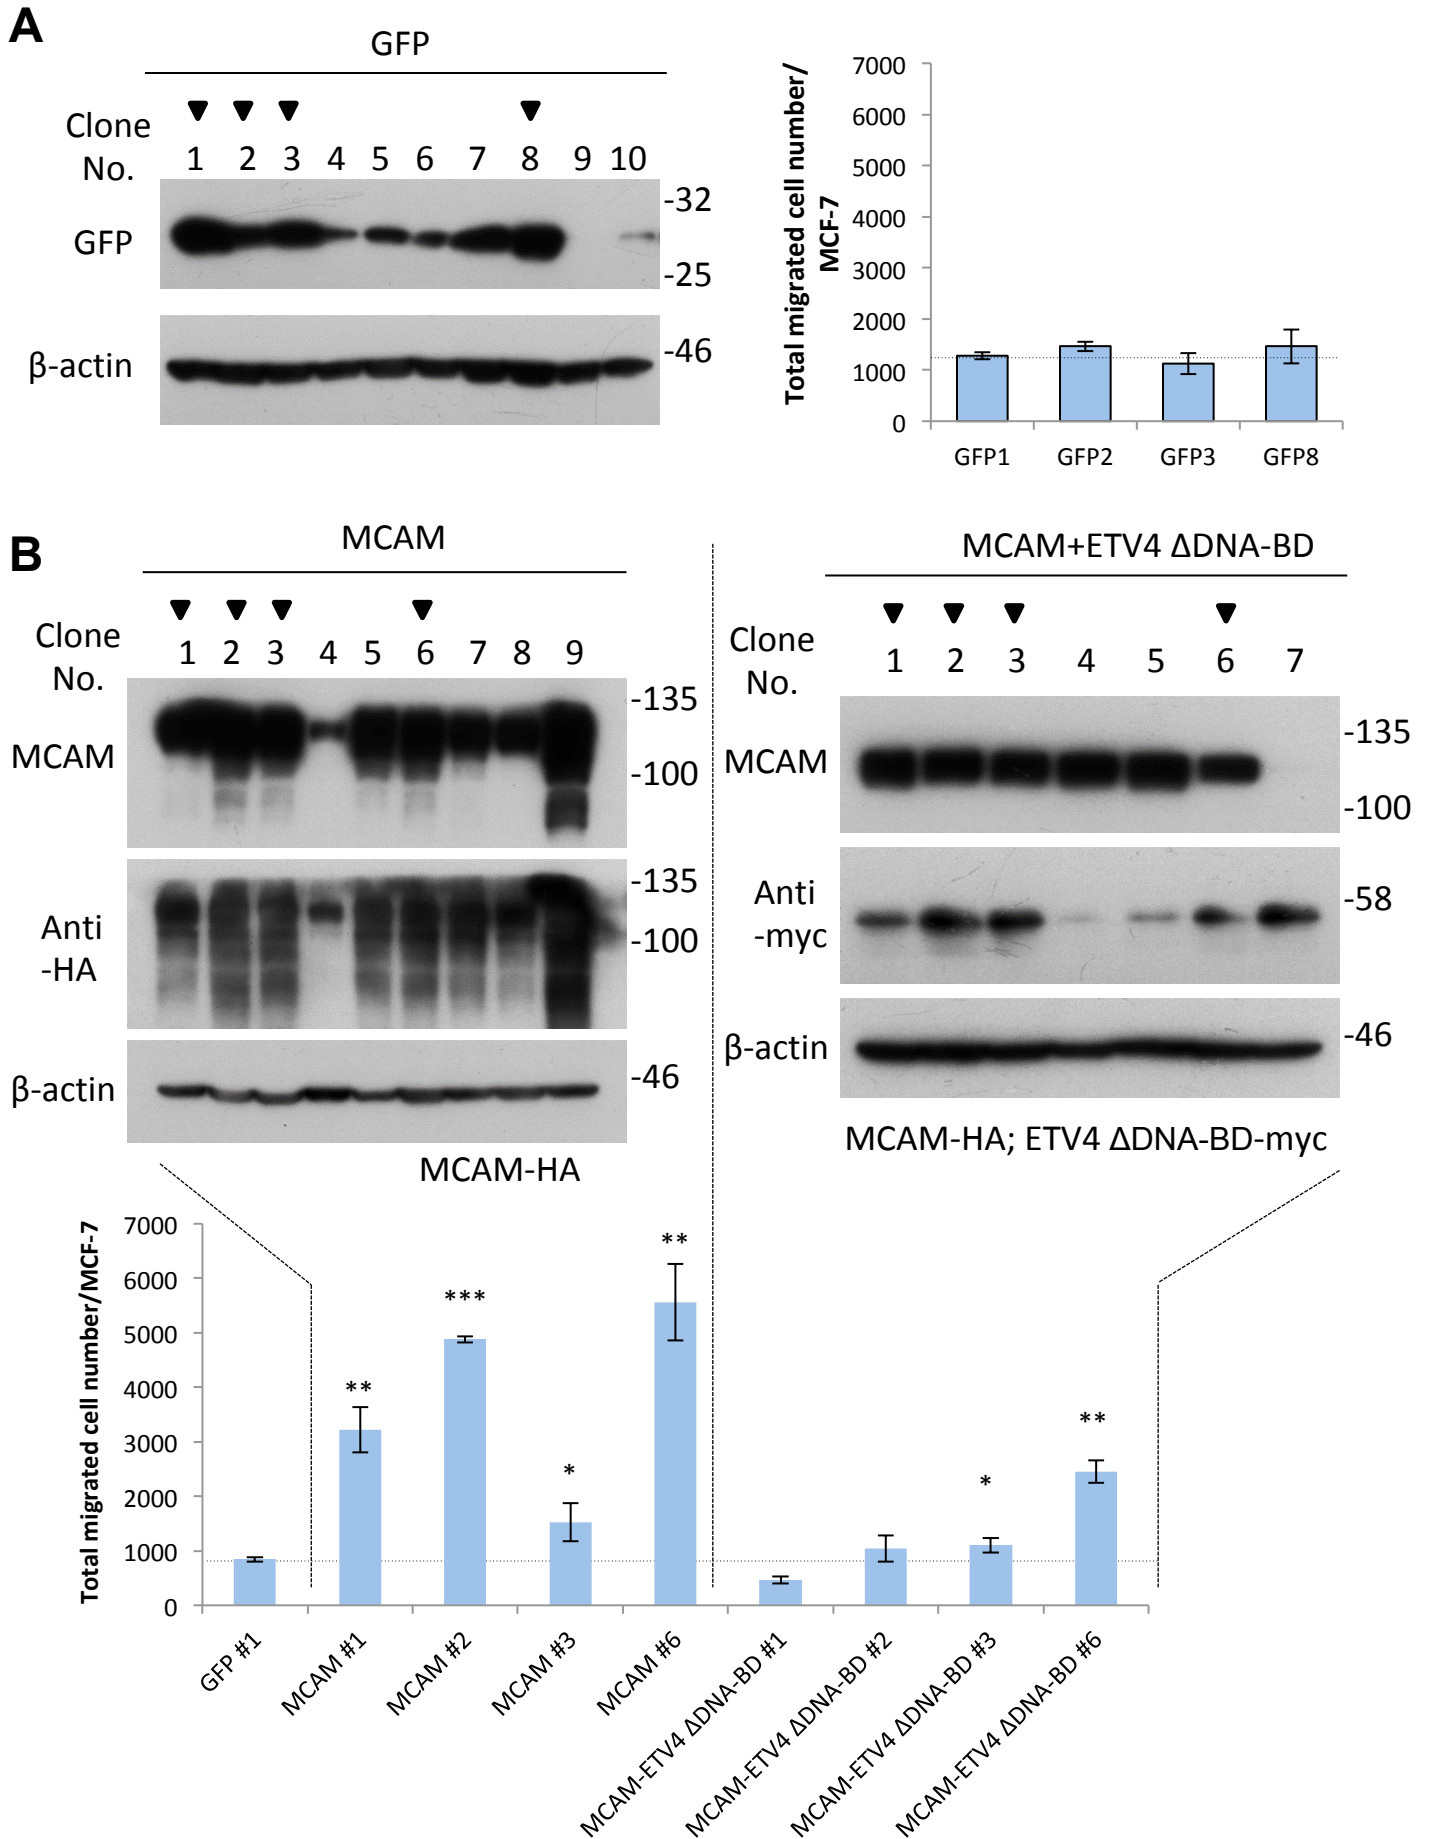



**Fig. S5**

**A**

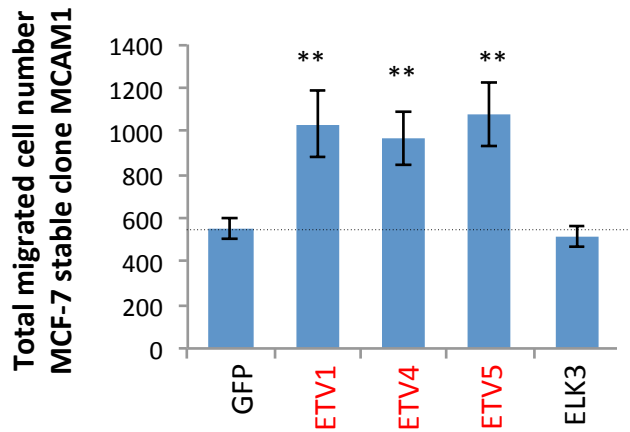

**B**

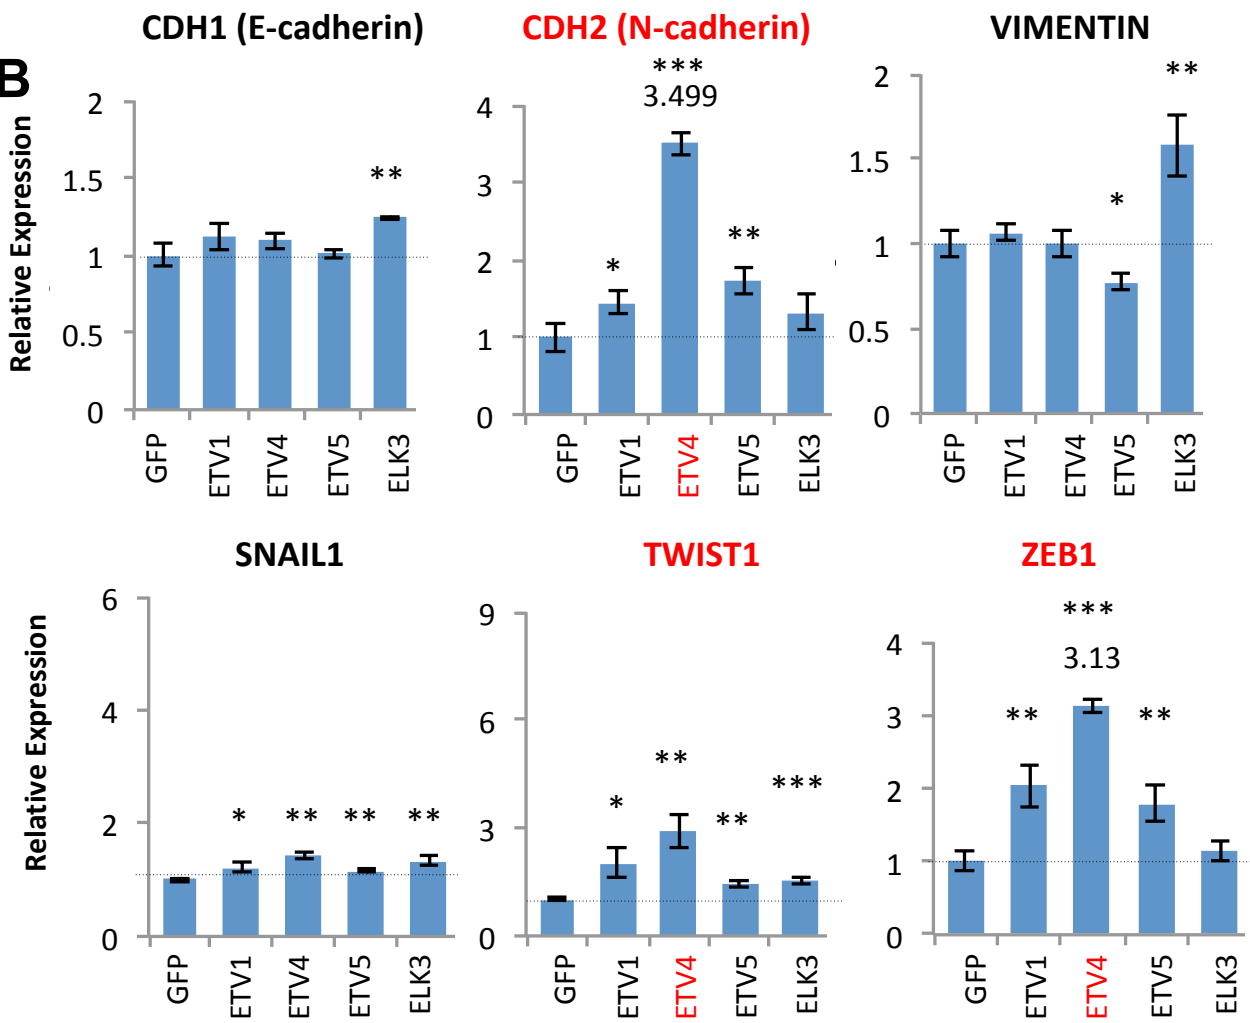

Fig. S6

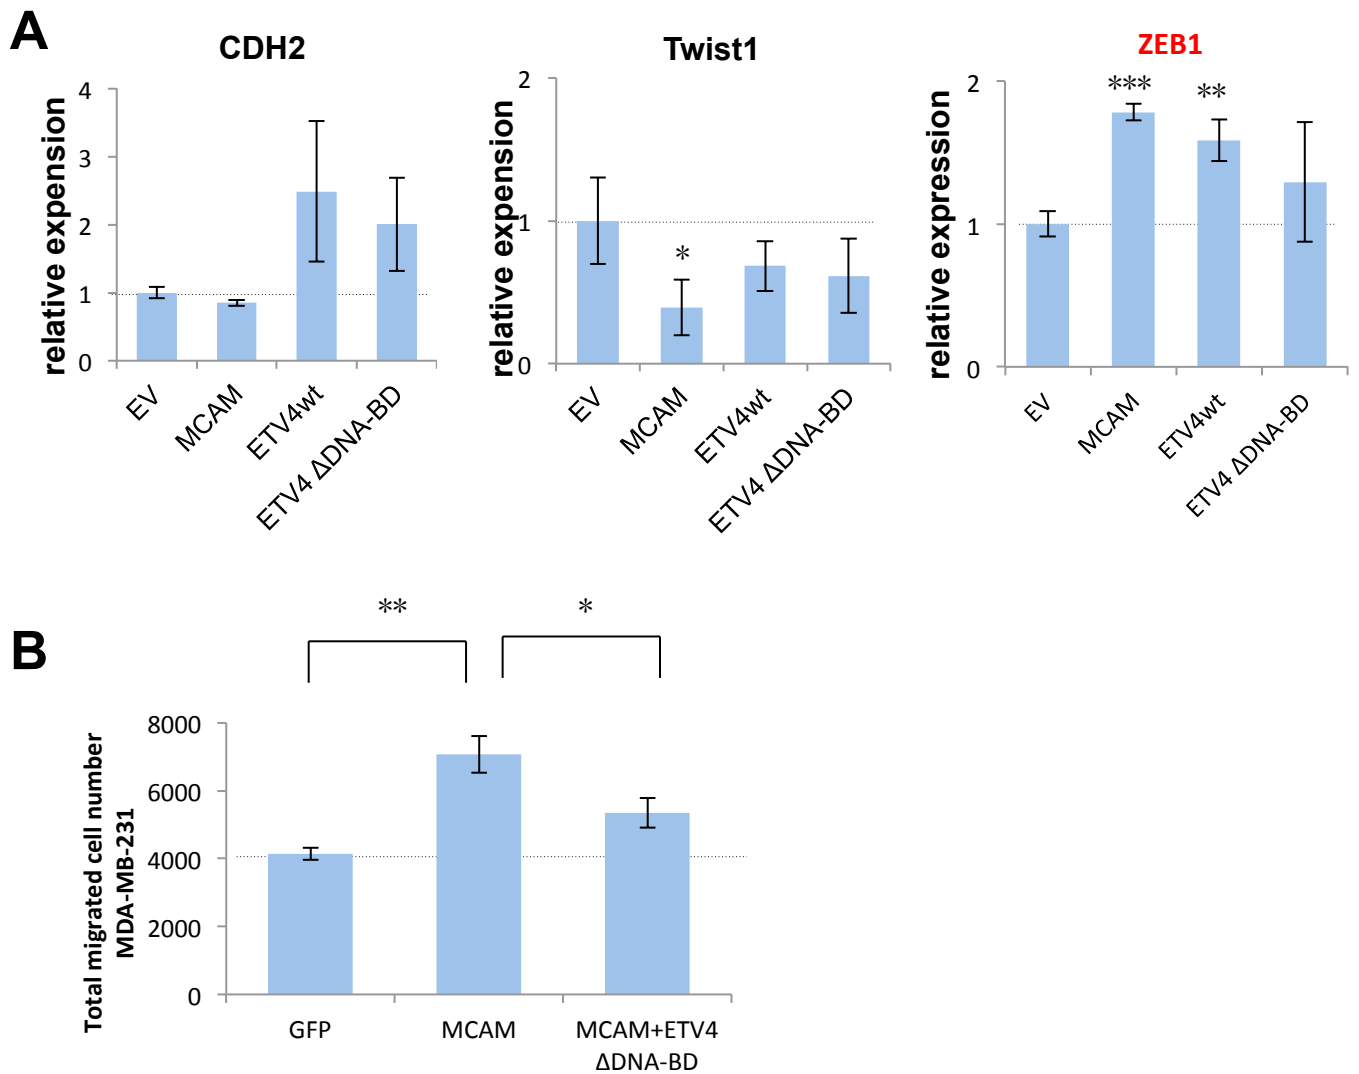

Fig. S7

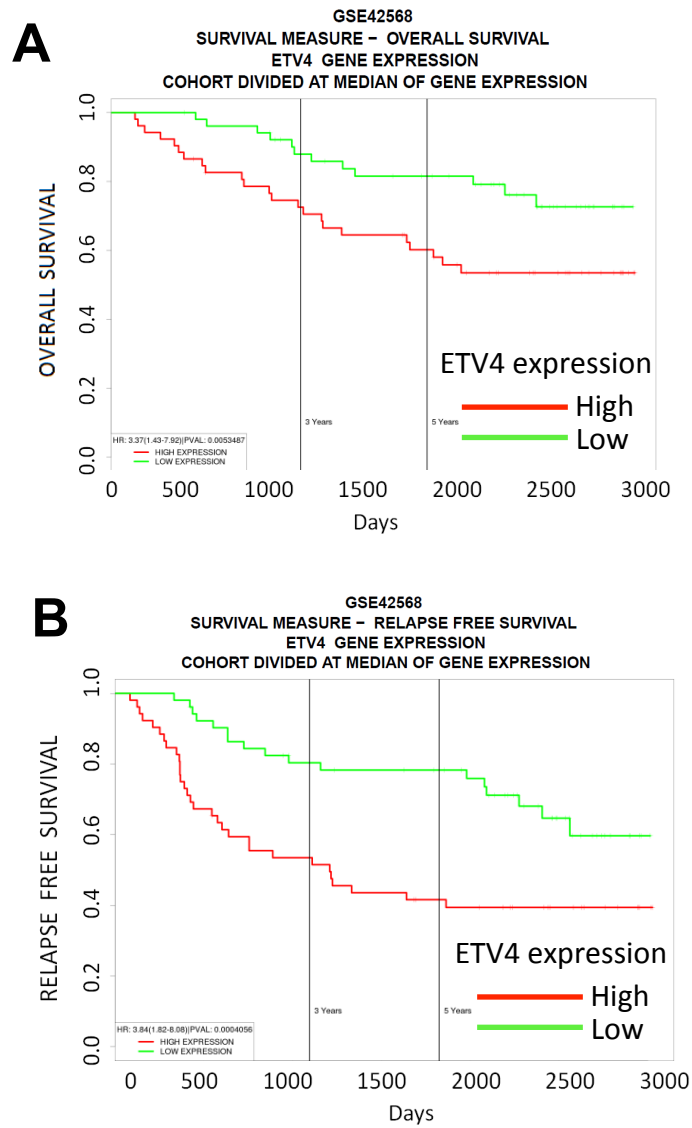



**Fig. S8**

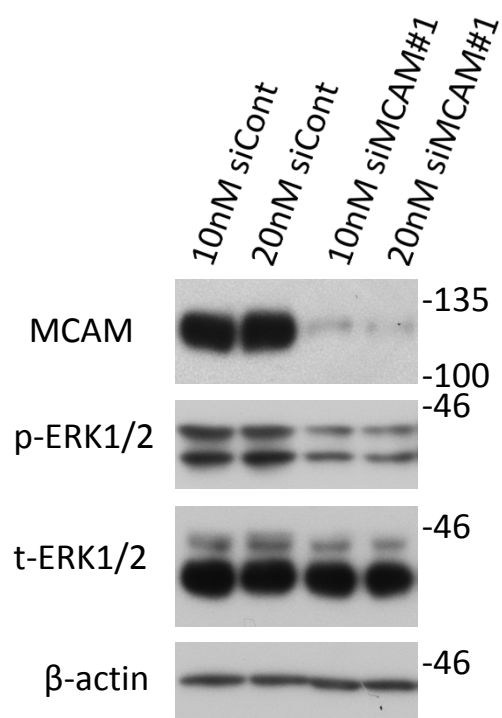

**Fig. S9**

**A**

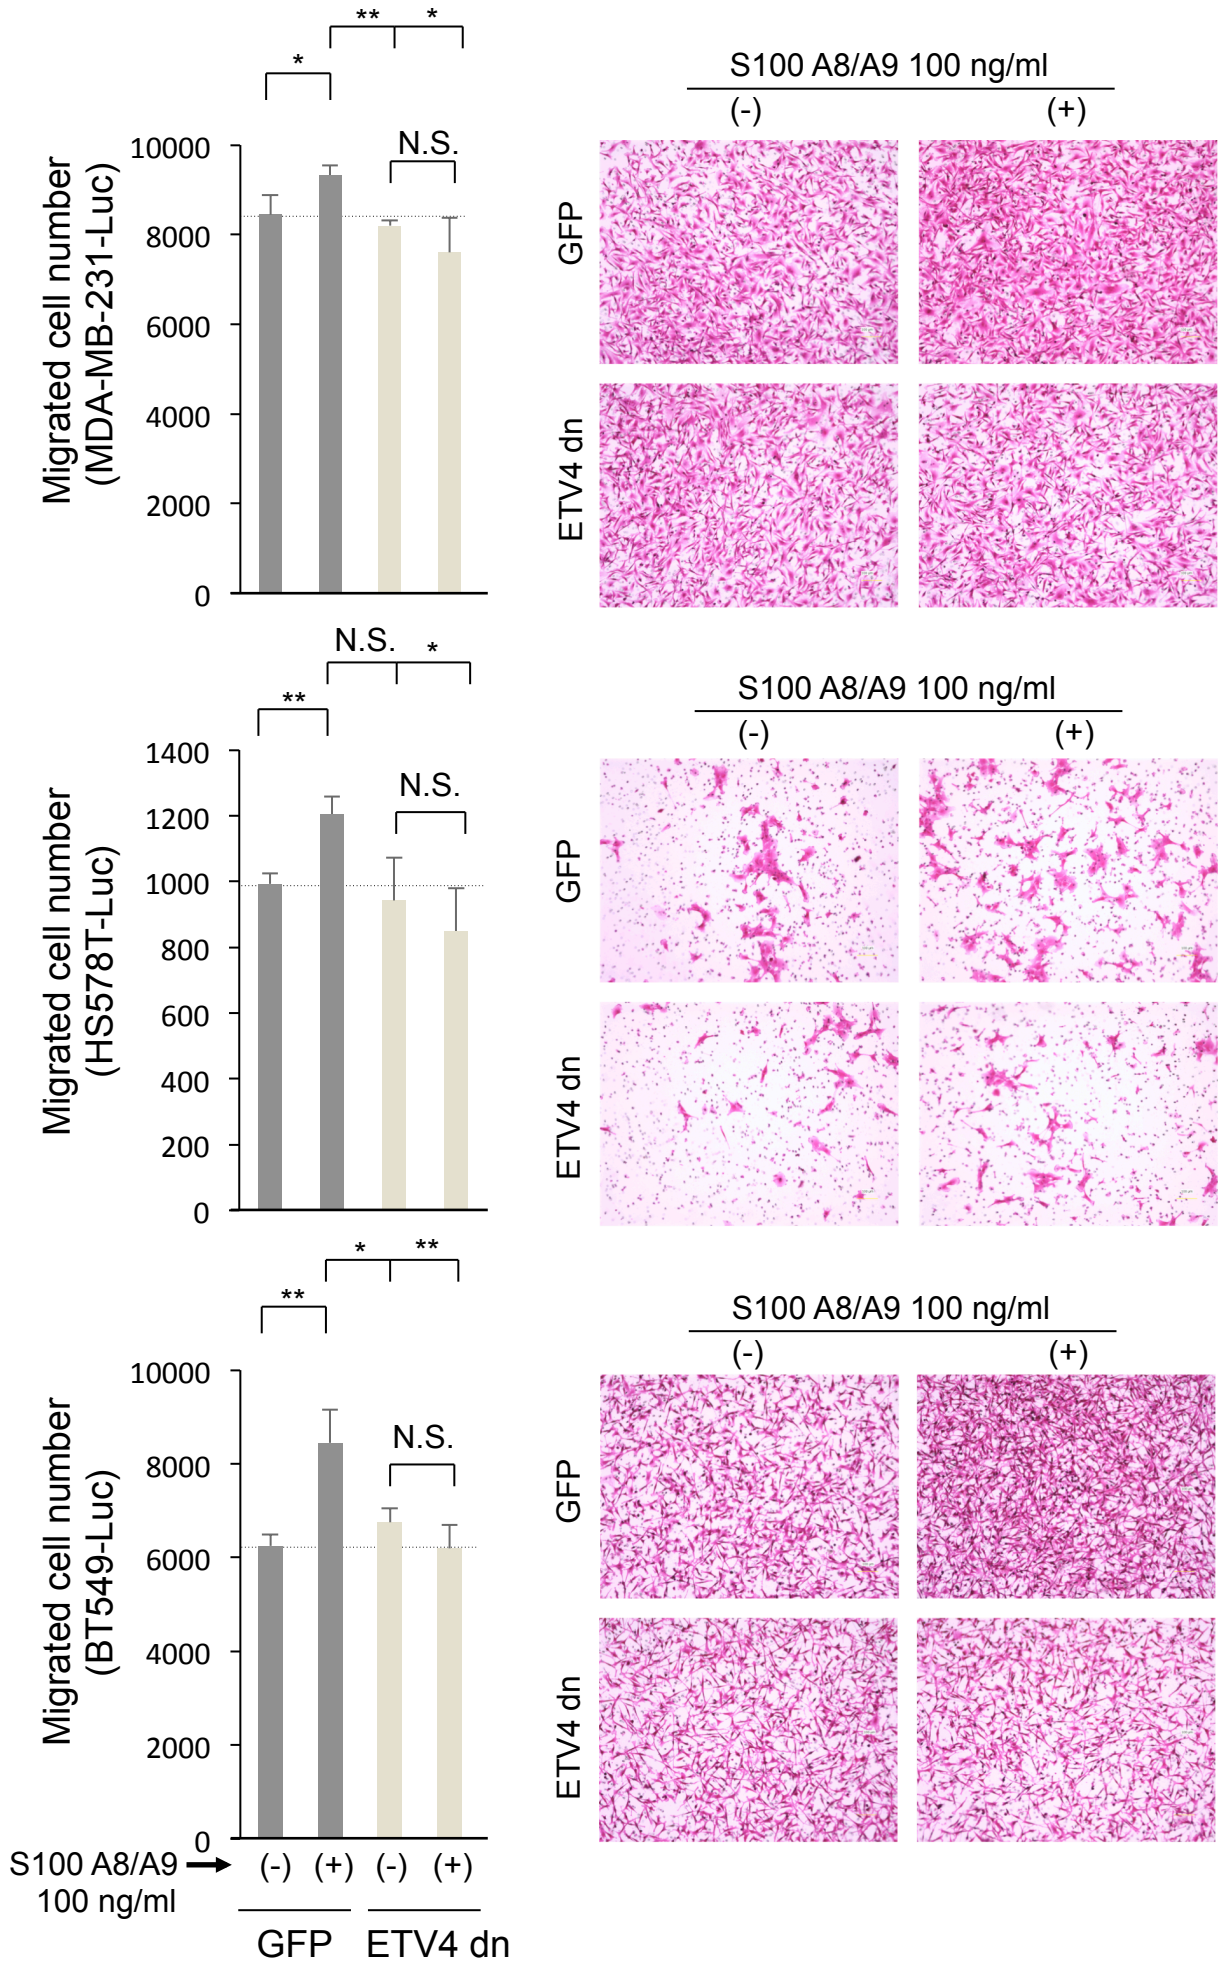

**Fig. S9**

**B**

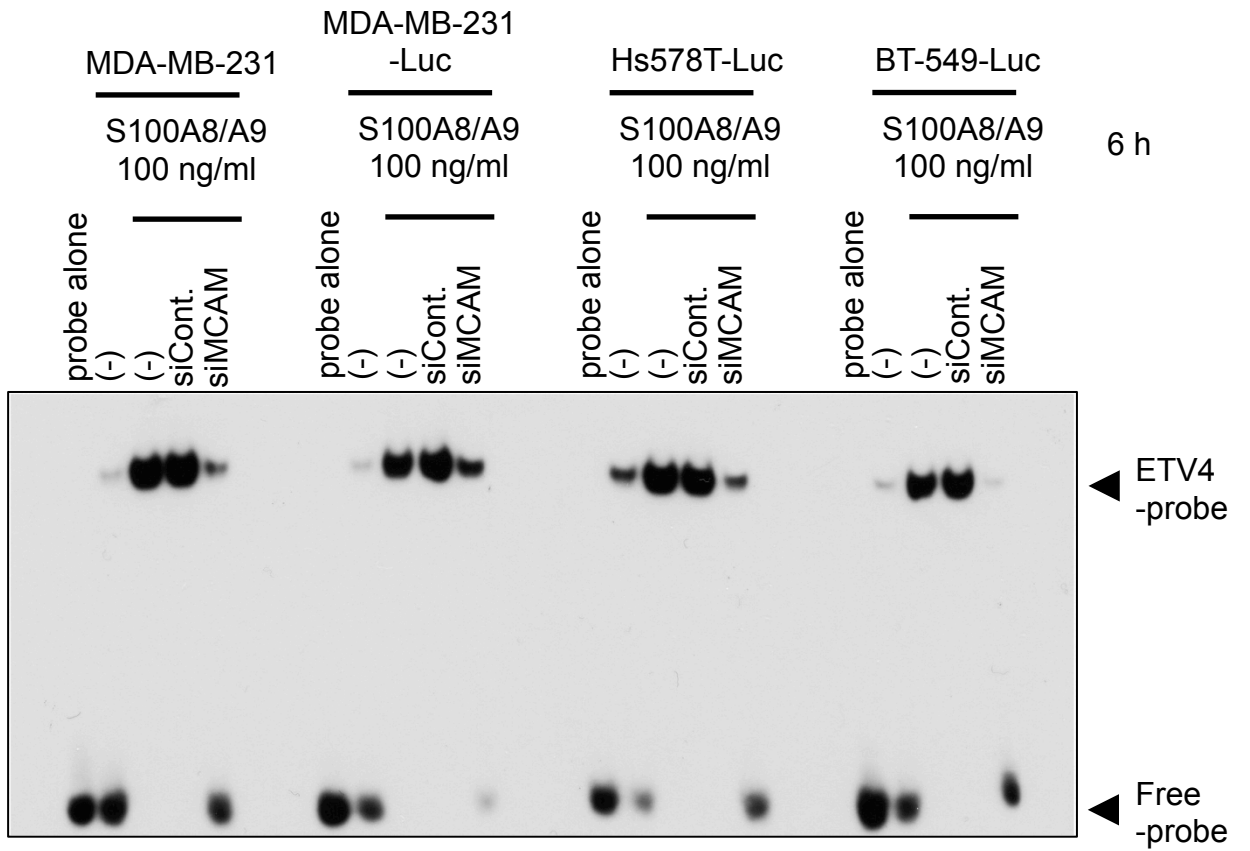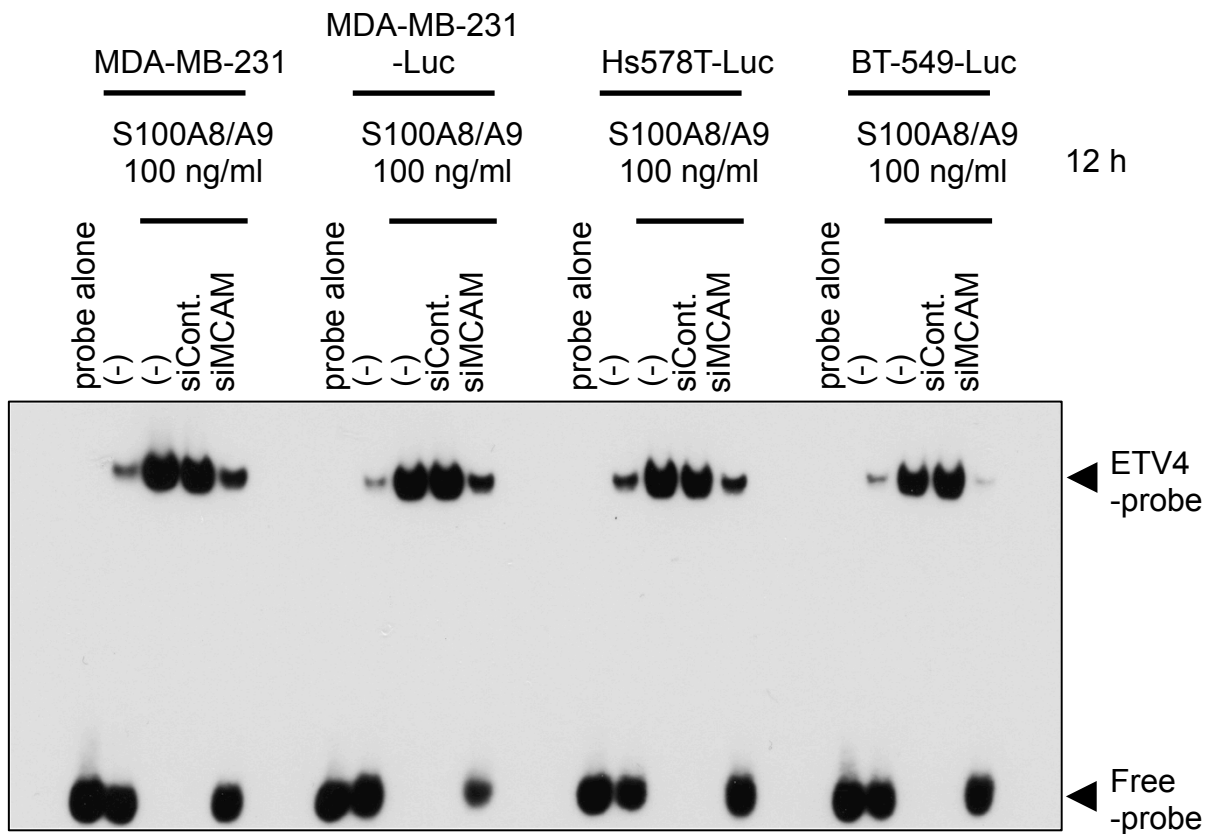

**Fig. S9**

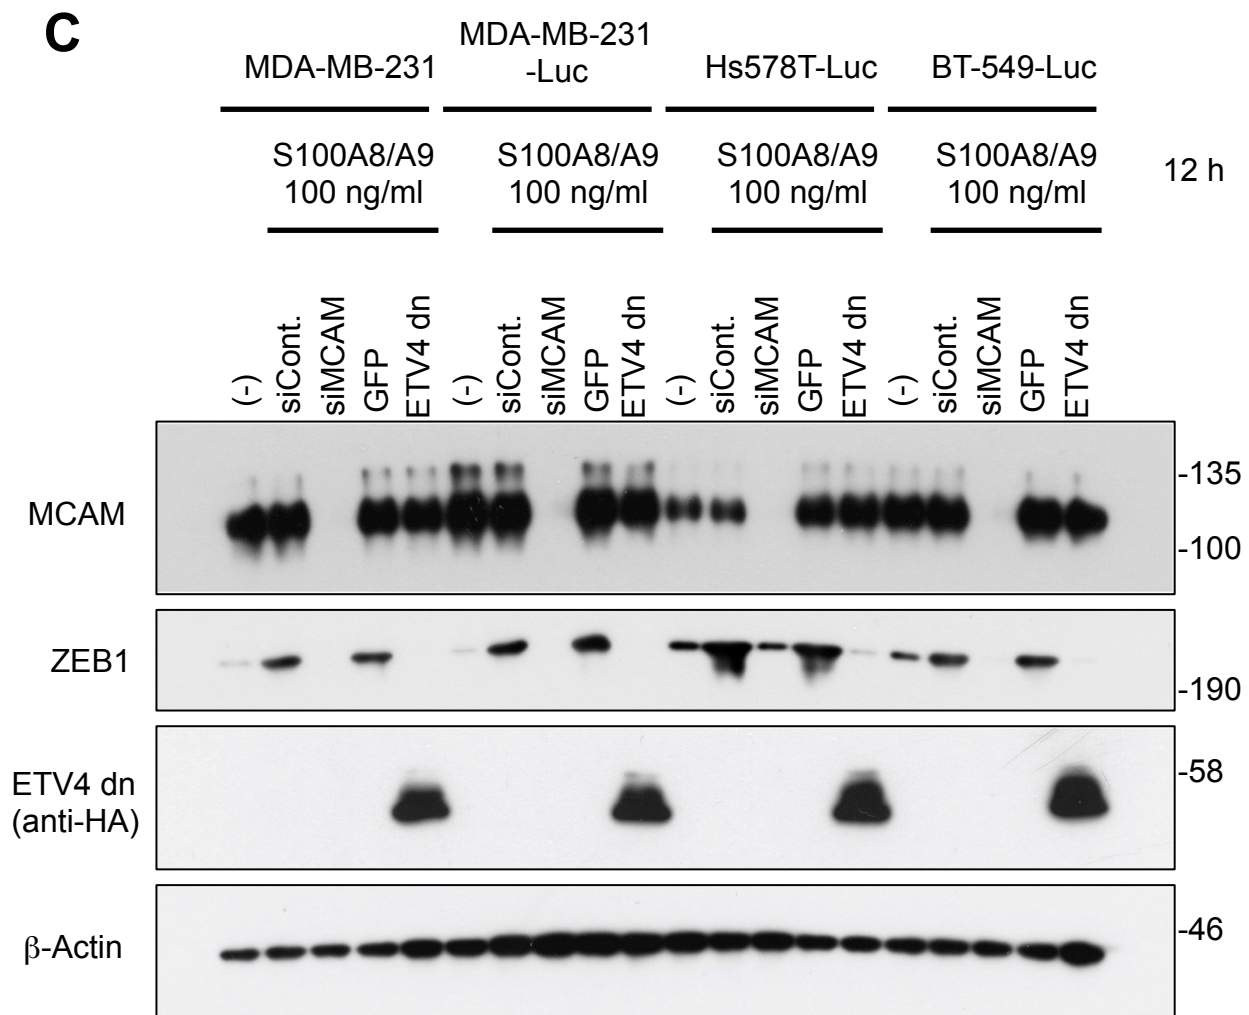

Supplement: mmc2.pdf [file mmc2.pdf]
